# Supplementary material for: Investigation of the terahertz vibrational modes of ZIF-8 and ZIF-90 with terahertz time-domain spectroscopy
Source: Royal Society of Chemistry journal article supplement (doi:10.1039/c5cc06455d), 2015-01-01
Supplement: c5cc06455d1.pdf [file c5cc06455d1.pdf]

**Electronic Supplementary Information for:**  
**Investigation of the terahertz vibrational modes of ZIF-8 and ZIF-90**  
**with terahertz time-domain spectroscopy**

Nicholas Y. Tan,<sup>a</sup> Michael T. Ruggiero,<sup>b</sup> Claudia Orellana-Tavra,<sup>a</sup> Tian Tian,<sup>a</sup> Andrew D. Bond,<sup>c</sup> Timothy M. Korter,<sup>b</sup> David Fairen-Jimenez,<sup>a</sup> and J. Axel Zeitler<sup>\*a</sup>

<sup>a</sup> Department of Chemical Engineering and Biotechnology, University of Cambridge, Pembroke Street, Cambridge CB2 3RA, U.K.; Tel: +44 1223 334783; E-mail: [jaz22@cam.ac.uk](mailto:jaz22@cam.ac.uk)

<sup>b</sup> Department of Chemistry, Syracuse University, 111 College Place, Syracuse, New York, U.S.A.

<sup>c</sup> Department of Chemistry, University of Cambridge, Lensfield Road, Cambridge CB2 1EW, U.K.

**S1. PXRD patterns for ZIF-8 and ZIF-90 (298 K, CuK $\alpha$  radiation)**

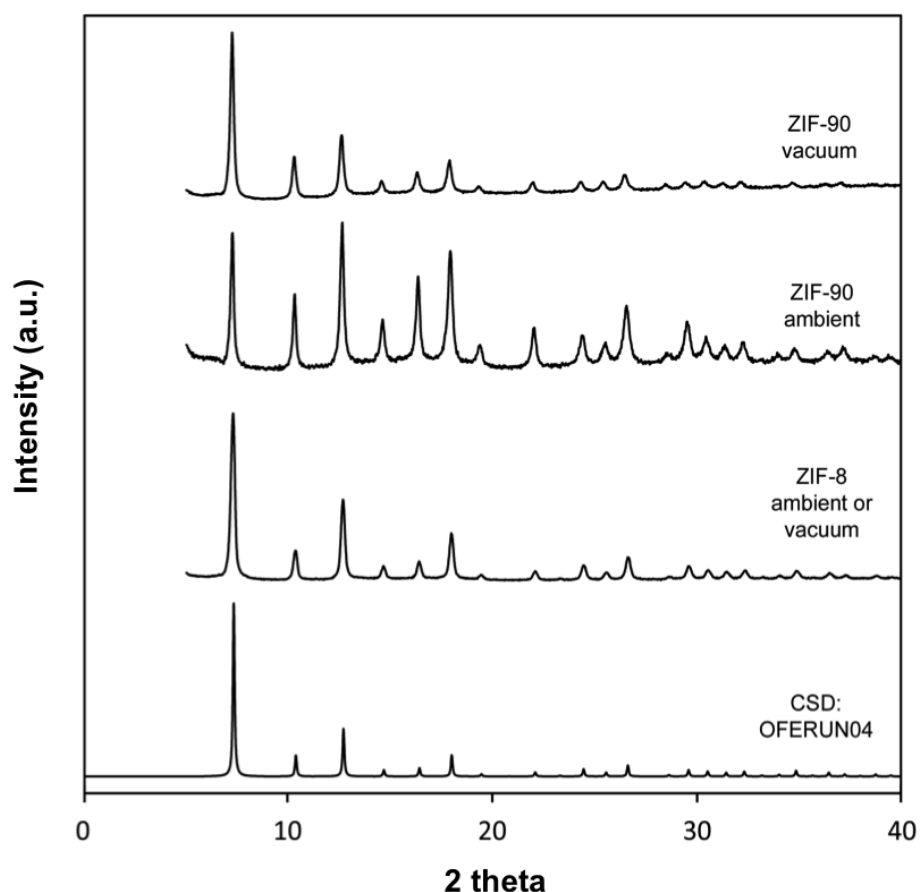

**Figure S1.** Powder X-ray diffraction (PXRD) patterns for simulated ZIF-90<sup>S1</sup> and experimental ZIF-8 and ZIF-90 at vacuum and ambient conditions.

## S2. PXRD: variation in relative intensities for ZIF-90

The changes in the observed relative intensities for the Bragg peaks in the PXRD pattern of ZIF-90 under ambient conditions and under vacuum are attributed to water adsorption/desorption. A coarse model illustrating the consistency of this interpretation was prepared as follows:

- (1) The crystal structure of the empty framework was extracted from the Cambridge Structural Database (refcode: OFERUN04<sup>S1</sup>).
- (2) The structure in space group I-43m was expanded to I1 (*i.e.* all non-translational symmetry elements were removed).
- (3) O atoms were placed at positions corresponding to a dodecahedron around the unit-cell origin, with O...O edges  $\approx 2.5$  Å (radius of enclosing sphere = 3.5 Å). The I-centring places a dodecahedron also in the void at  $(\frac{1}{2}, \frac{1}{2}, \frac{1}{2})$ .

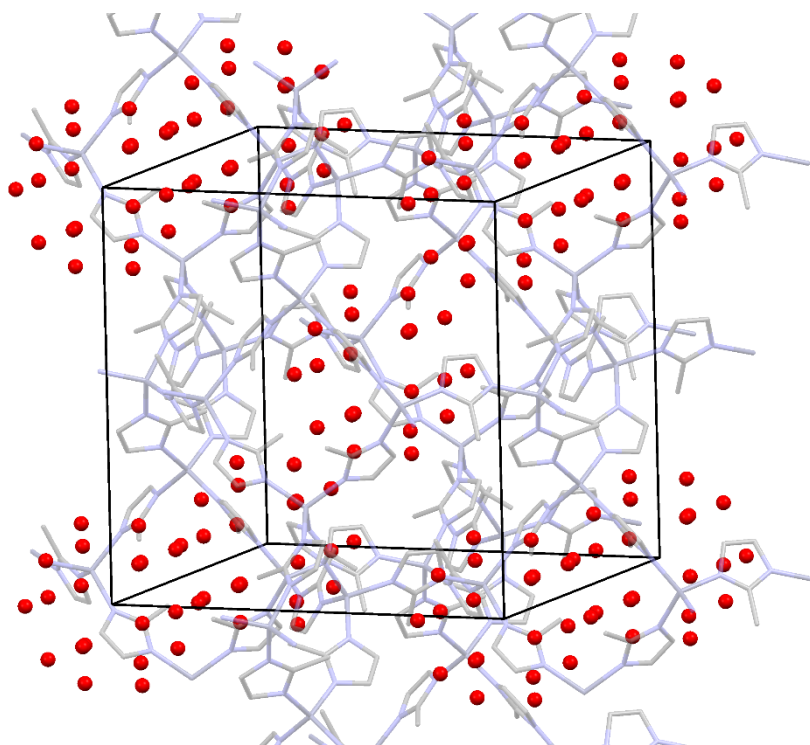

**Figure S2.** Crystalline model for ZIF-90, grey and blue, with adsorbed water molecules, red spheres.

Note that this model is not chemically or energetically rigorous – it is only intended to create a reasonable electron density distribution in the voids of ZIF-90. The simulated PXRD pattern shows changes in the relative intensities of the Bragg peaks compared to the empty ZIF-90 structure, which correspond to those seen by experiment:

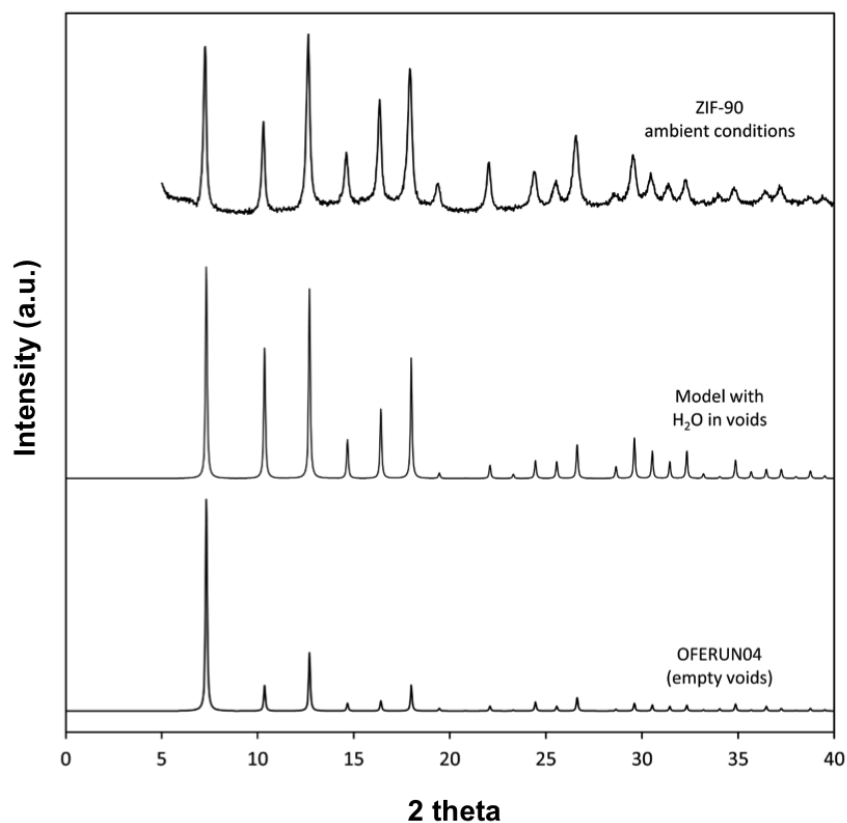

**Figure S3.** Powder X-ray diffraction (PXRD) patterns for simulated empty ZIF-90 and water adsorbed ZIF-90, and experimental ZIF-90 at ambient conditions. Note the changes in the relative intensities.

### S3. References

S1. A.-X. Zhu, R.-B. Lin, X.-L. Qi, Y. Liu, Y.-Y. Lin, J.-P. Zhang, X.-M. Chen, *Micro. Meso. Mat.* 2012, **157**, 42.
